# Supplementary material
Source: publisher figshare collection journal article supplement (https://acs.figshare.com/ndownloader/files/28887592)
Supplement: Supplementary file 1 [file 28887592]

# Are Heptazine-Based Organic Light-Emitting Diode (OLED) Chromophores

## Thermally Activated Delayed Fluorescence (TADF) or Inverted Singlet-Triplet (IST) Systems?

Andrzej L. Sobolewski<sup>1</sup> and Wolfgang Domcke<sup>2</sup>

<sup>1</sup> Institute of Physics, Polish Academy of Sciences, Warsaw, Poland

<sup>2</sup> Department of Chemistry, Technical University of Munich, Garching, Germany

### Supporting Information

Table S1. Vertical excitation energies ( $\Delta E$ ) and oscillator strengths ( $f$ ) of the lowest excited states of HAP-3MF, determined with the TDDFT/B3LYP/cc-pVDZ method at the DFT-D3/B3LYP/cc-pVDZ equilibrium geometry of the electronic ground state.

| state                  | $\Delta E/\text{eV}$ | $f$   |
|------------------------|----------------------|-------|
| $^3A'(\pi\pi^*)$       | 2.64                 | -     |
| $^1A'(\pi\pi^*)$       | 2.81                 | 0.0   |
| $^3E'(\pi\pi^*)$       | 2.94                 | -     |
| $^3A''(\text{n}\pi^*)$ | 3.45                 | -     |
| $^1E'(\pi\pi^*)$       | 3.52                 | 0.880 |
| $^3E''(\text{n}\pi^*)$ | 3.54                 | -     |
| $^1A''(\text{n}\pi^*)$ | 3.55                 | 0.0   |
| $^1E''(\text{n}\pi^*)$ | 3.65                 | 0.0   |

Table S2. Vertical excitation energies ( $\Delta E$ ) and oscillator strengths ( $f$ ) of the lowest excited states of HAP-3TPA and truncated HAP-3TPA (HAP-3TPA-t), determined with the TDDFT/B3LYP/cc-pVDZ method at the DFT-D3/B3LYP/cc-pVDZ equilibrium geometry of the electronic ground state.

| state             | HAP-3TPA             |       | HAP-3TPA-t           |       |
|-------------------|----------------------|-------|----------------------|-------|
|                   | $\Delta E/\text{eV}$ | $f$   | $\Delta E/\text{eV}$ | $f$   |
| $^3E(\pi\pi^*)$   | 2.15                 | -     | 2.22                 | -     |
| $^3A_1(\pi\pi^*)$ | 2.20                 | -     | 2.27                 | -     |
| $^1E(\pi\pi^*)$   | 2.43                 | 1.607 | 2.52                 | 1.530 |
| $^3A_2(\pi\pi^*)$ | 2.65                 | -     | 2.65                 | -     |
| $^1A_1(\pi\pi^*)$ | 2.65                 | 0.0   | 2.74                 | 0.0   |
| $^1A_2(\pi\pi^*)$ | 2.81                 | 0.0   | 2.81                 | 0.0   |

| occupied orbitals                                                                   |                                                                                   |                                                                                    |                                                                                     |
|-------------------------------------------------------------------------------------|-----------------------------------------------------------------------------------|------------------------------------------------------------------------------------|-------------------------------------------------------------------------------------|
| 104a' (-11.95)                                                                      | 105a' (-11.91)                                                                    |                                                                                    | 106a' (-11.91)                                                                      |
| 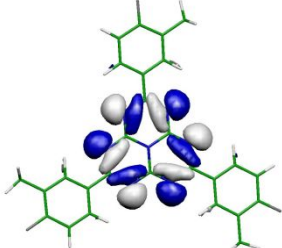   |  |                                                                                    |  |
| 19a'' (-9.38)                                                                       | 20a'' (-9.17)                                                                     | 21a'' (-9.16)                                                                      | 22a'' (-9.16)                                                                       |
|    |  |  |  |
| LUMO                                                                                |                                                                                   |                                                                                    |                                                                                     |
| 23a'' (0.54)                                                                        |                                                                                   |                                                                                    |                                                                                     |
|  |                                                                                   |                                                                                    |                                                                                     |

Figure S1. The highest occupied and lowest unoccupied Hartree-Fock orbitals involved in the lowest electronic excitations of HAP-3MF at the ground-state equilibrium geometry. The orbital energies (in eV) are shown in parentheses. Orbitals were plotted with an isosurface value of 0.03.

| state  | occ no. | hole                                                                              | electron                                                                            |
|--------|---------|-----------------------------------------------------------------------------------|-------------------------------------------------------------------------------------|
| $^1A'$ | 0.951   | 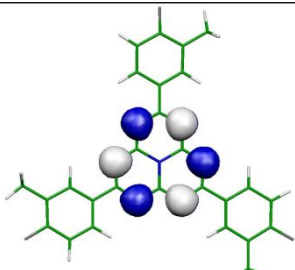 |  |
| $^3A'$ | 0.960   |                                                                                   |                                                                                     |

Figure S2. Occupation numbers and natural transition orbitals involved in the excitation to the  $^1A'$  and  $^3A'$  excited states of HAP-3MF at the ground-state equilibrium geometry. Orbitals were plotted with an isosurface value of 0.03.

| state                    | E <sub>ad</sub> /eV | E <sub>em</sub> /eV | occ. no. | hole                                                                                | electron                                                                              |
|--------------------------|---------------------|---------------------|----------|-------------------------------------------------------------------------------------|---------------------------------------------------------------------------------------|
| C <sub>3h</sub> symmetry |                     |                     |          | 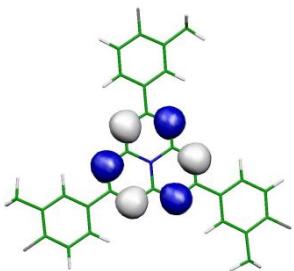 |  |
| <sup>1</sup> A'          | 2.47                | 2.42                | 0.951    |                                                                                     |                                                                                       |
| <sup>3</sup> A'          | 2.72                | 2.67                | 0.974    |                                                                                     |                                                                                       |
| Δ <sub>ST</sub>          | -0.25               | -0.25               |          |                                                                                     |                                                                                       |
| C <sub>3</sub> symmetry  |                     |                     |          |  |  |
| S <sub>1</sub>           | 2.43                | 2.06                | 0.955    |                                                                                     |                                                                                       |
| T <sub>1</sub>           | 2.69                | 2.36                | 0.957    |                                                                                     |                                                                                       |
| Δ <sub>ST</sub>          | -0.26               | -0.30               |          |                                                                                     |                                                                                       |

Figure S3. Adiabatic excitation energies ( $E_{ad}$ ), vertical emission energies ( $E_{em}$ ), natural occupation numbers, and natural transition orbitals of the lowest excited states of HAP-3MF, determined with the ADC(2)/cc-pVDZ method with the indicated symmetry constraints. Orbitals were plotted with an isosurface value of 0.03.

| occupied orbitals                                                                  |                                                                                    |                                                                                      |
|------------------------------------------------------------------------------------|------------------------------------------------------------------------------------|--------------------------------------------------------------------------------------|
| 117a (-9.13)                                                                       | 120a (-8.79)                                                                       |                                                                                      |
| 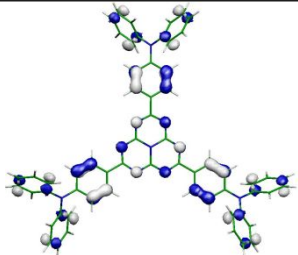  |  |                                                                                      |
| 114b (-7.32)                                                                       | 115b (-7.24)                                                                       | 121a (-7.24)                                                                         |
|   |   |   |
| unoccupied orbitals                                                                |                                                                                    |                                                                                      |
| 116b (0.93)                                                                        | 117b (1.80)                                                                        | 122a (1.80)                                                                          |
|  |  |  |

Figure S4. The highest occupied and lowest unoccupied Hartree-Fock orbitals involved in the lowest electronic excitations of HAP-3TPA-t at the ground-state equilibrium geometry. The orbital energies (in eV) are shown in parentheses. Orbitals were plotted with an isosurface value of 0.03.

| state   | occ no. | hole | electron |
|---------|---------|------|----------|
| $^1A_1$ | 0.949   |      |          |
| $^3A_1$ | 0.957   |      |          |
| $^1E_x$ | 0.831   |      |          |
| $^3E_x$ | 0.770   |      |          |
| $^1E_y$ | 0.827   |      |          |
| $^3E_y$ | 0.759   |      |          |

Figure S5. Occupation numbers and natural transition orbitals involved in the excitation to the lowest excited electronic states of HAP-3TPA-t at the ground-state equilibrium geometry. Orbitals were plotted with an isosurface value of 0.03.

| state   | $E_{ad}/\text{eV}$ | $E_{em}/\text{eV}$ | occ. no. | hole                                                                                | electron                                                                             |
|---------|--------------------|--------------------|----------|-------------------------------------------------------------------------------------|--------------------------------------------------------------------------------------|
| $^1B$   | 2.50               | 2.42               | 0.950    | 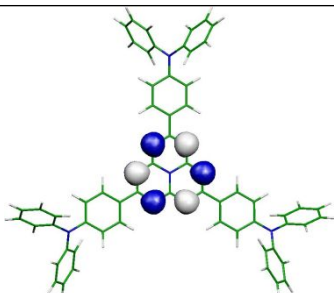  |   |
| $^3E_x$ | 2.49               | 2.36               | 0.947    |   |   |
| $^3E_y$ | 2.55               | 2.48               | 0.768    |  |  |

Figure S6. Adiabatic excitation energies ( $E_{ad}$ ) vertical emission energies ( $E_{em}$ ), natural occupation numbers, and natural transition orbitals of the lowest excited states of HAP-3TPA-t determined with the ADC(2)/def-SV(P) method at the equilibrium geometry of a given excited state. Orbitals were plotted with an isosurface value of 0.03.
